# Supplementary material for: Confining He Atoms in Diverse Ice-Phases: Examining the Stability of He Hydrate Crystals through DFT Approaches
Source: MDPI journal article supplement (doi:10.3390/molecules28237893), 2023-12-01
Supplement: s1 [file s1]

# **Confining He Atoms in Diverse Ice-phases: Examining the Stability of He Hydrate Crystals Through DFT Approaches**

Raquel Yanes-Rodríguez<sup>1a</sup> and Rita Prosmiti<sup>1\*</sup>

<sup>1</sup>*Institute of Fundamental Physics (IFF-CSIC), CSIC, Serrano 123, 28006 Madrid, Spain*

E-mail: \*rita@iff.csic.es; Phone: +34-91-5616800 Ext. 442292

---

<sup>a</sup>Doctoral Programme in Theoretical Chemistry and Computational Modelling, Doctoral School, Universidad Autónoma de Madrid

**SUPPLEMENTARY MATERIAL**

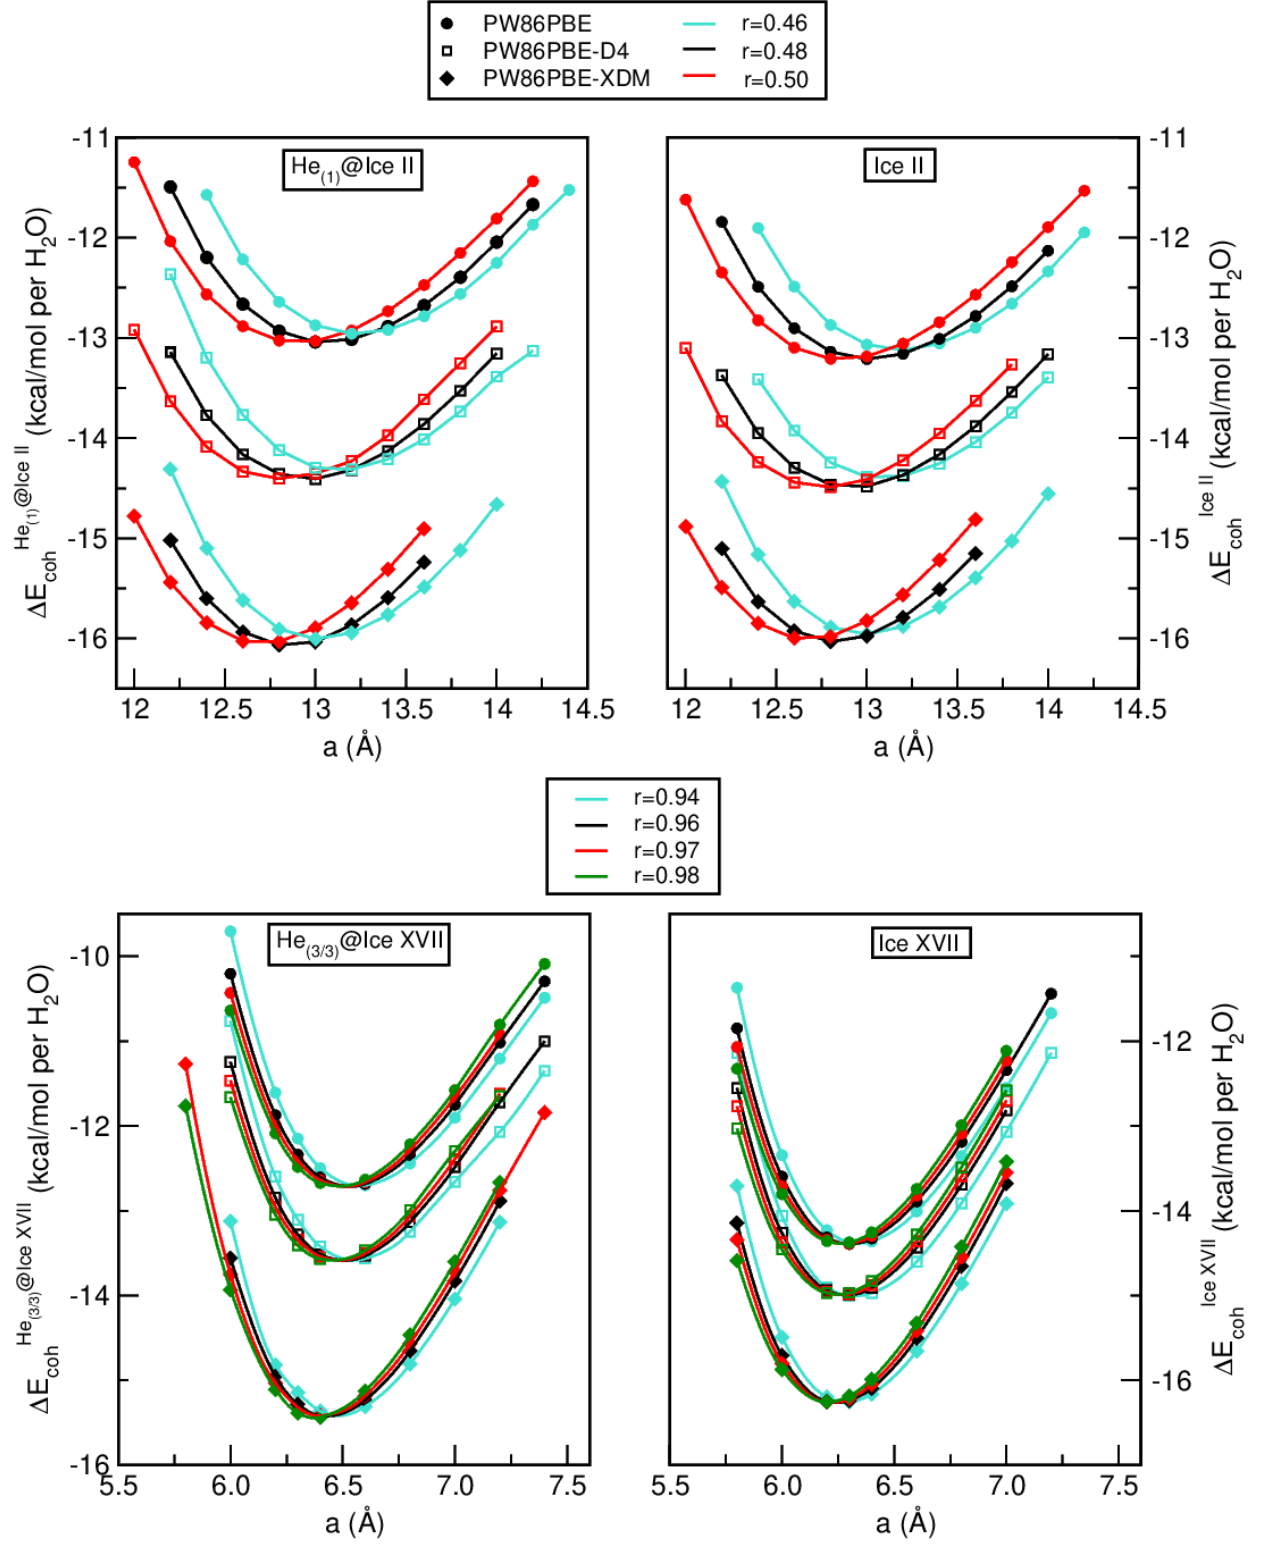

Figure S1: Cohesive energies of the He-filled (left panels) and empty (right panels) ice II and ice XVII as a function of the lattice constant  $a$  and ratio  $r$ . Symbols indicate the computed values from the PW86PBE/-D4/-XDM calculations.

Table S1: MEOS fitting results obtained from semi-local and non-local DFT functionals for both He-filled and empty ice II and ice XVII.

| System                        | Parameter                                      | PW86PBE    | PW86PBE-D4 | PW86PBE-XDM | PW86PBE-D3(0) | revPBE-D3(0) | optB88-vdW | vdW-DF     | vdW-DF2    |
|-------------------------------|------------------------------------------------|------------|------------|-------------|---------------|--------------|------------|------------|------------|
| Ice II                        | $a'_0 / c'_0$ (Å)                              | 13.00/6.26 | 12.90/6.21 | 12.81/6.17  | 12.77/6.15    | 12.81/6.17   | 12.66/6.10 | 13.32/6.42 | 13.12/6.32 |
|                               | $\Delta E_{\text{coh}}(a'_0, c'_0)$ (keal/mol) | -13.21     | -14.49     | -16.03      | -16.40        | -13.94       | -16.76     | -13.49     | -15.01     |
|                               | $B_0$ (GPa)                                    | 15.47      | 16.57      | 19.48       | 19.70         | 14.66        | 19.45      | 12.16      | 15.94      |
|                               | $B'_0$                                         | 5.71       | 5.94       | 5.57        | 5.35          | 5.99         | 5.70       | 4.85       | 5.03       |
| He <sub>(1)</sub> @ice II     | $a_0/c_0$ (Å)                                  | 13.03/6.30 | 12.92/6.25 | 12.82/6.20  | 12.76/6.17    | 12.84/6.21   | 12.67/6.13 | 13.34/6.45 | 13.12/6.35 |
|                               | $\Delta E_{\text{coh}}(a_0, c_0)$ (keal/mol)   | -13.05     | -14.41     | -16.07      | -16.53        | -13.93       | -17.02     | -13.85     | -15.24     |
|                               | $B_0$ (GPa)                                    | 15.15      | 16.56      | 19.66       | 20.03         | 14.74        | 19.76      | 12.35      | 16.32      |
|                               | $B'_0$                                         | 5.71       | 5.98       | 5.73        | 5.81          | 6.13         | 5.77       | 4.93       | 5.43       |
| Ice XVII                      | $a'_0/c'_0$ (Å)                                | 6.29/6.04  | 6.28/6.03  | 6.24/5.99   | 6.23/5.98     | 6.30/6.05    | 6.18/5.93  | 6.47/6.21  | 6.42/6.17  |
|                               | $\Delta E_{\text{coh}}(a'_0, c'_0)$ (keal/mol) | -14.36     | -14.98     | -16.22      | -16.34        | -14.00       | -16.18     | -13.07     | -14.64     |
|                               | $B_0$ (GPa)                                    | 11.29      | 11.79      | 12.92       | 12.82         | 9.42         | 11.27      | 7.00       | 8.75       |
|                               | $B'_0$                                         | 6.28       | 5.89       | 6.03        | 6.08          | 6.19         | 5.11       | 4.16       | 3.67       |
| He <sub>(3/3)</sub> @ice XVII | $a_0/c_0$ (Å)                                  | 6.75/6.48  | 6.72/6.52  | 6.66/6.39   | 6.61/6.34     | 6.54/6.28    | 6.59/6.33  | 6.93/6.65  | 6.78/6.51  |
|                               | $\Delta E_{\text{coh}}(a_0, c_0)$ (keal/mol)   | -12.67     | -13.54     | -15.41      | -16.01        | -13.13       | -16.04     | -13.99     | -15.04     |
|                               | $B_0$ (GPa)                                    | 8.43       | 8.86       | 10.89       | 11.65         | 8.16         | 10.15      | 7.25       | 9.37       |
|                               | $B'_0$                                         | 6.39       | 6.69       | 5.71        | 6.62          | 6.06         | 5.89       | 5.61       | 5.73       |

### Empty Ice II

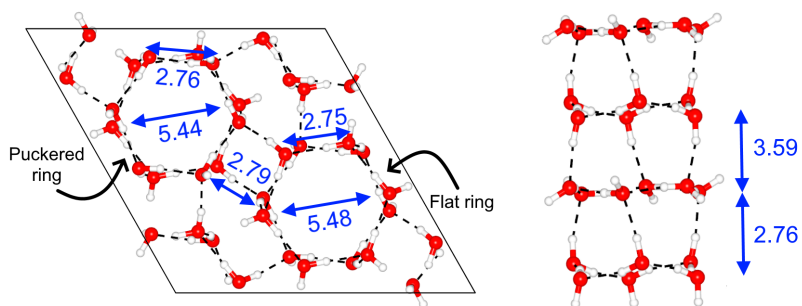

### He<sub>(1)</sub>@Ice II

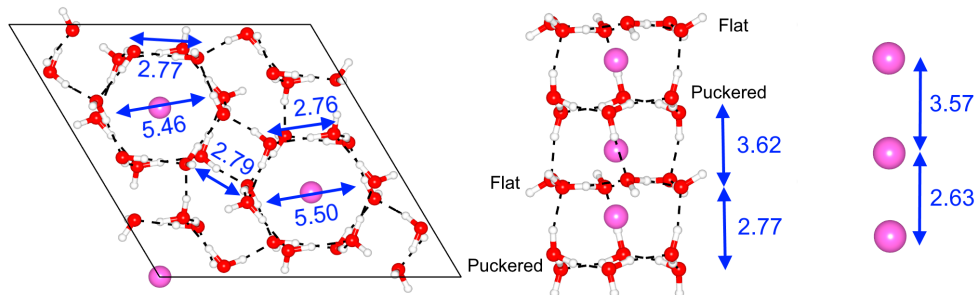

### He<sub>(2)</sub>@Ice II

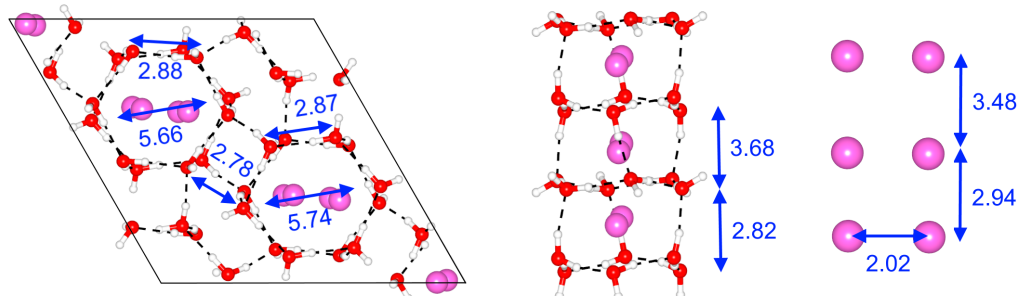

### He<sub>(3)</sub>@Ice II

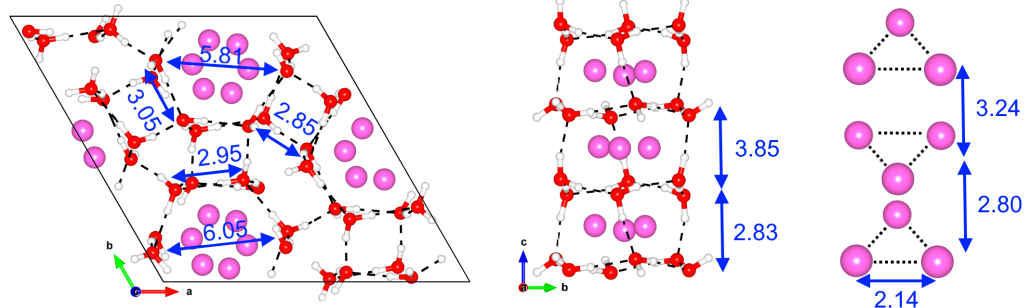

Figure S2: Average bond length and distances in Å for the empty and He-filled ice II structures considered in this study.

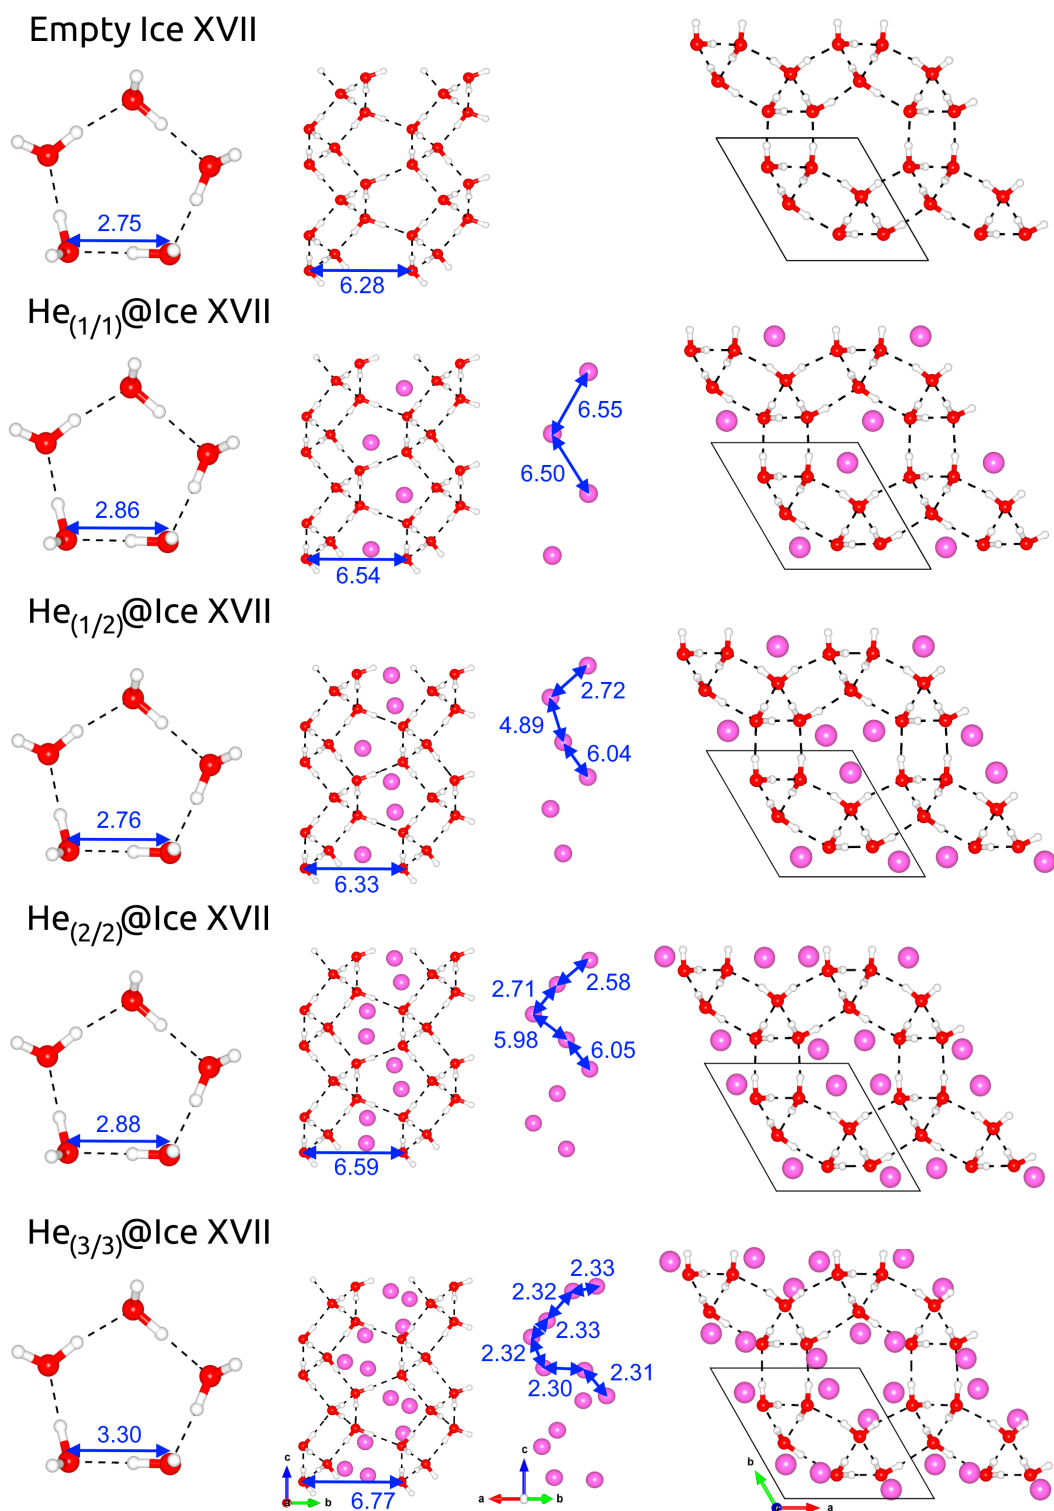

Figure S3: Average bond length and distances in Å for the empty and He-filled ice XVII structures considered in this study.
